# Supplementary material
Source: Springer Nature journal article supplement (https://www.springermedizin.de/resource/supplementary/13012_2008_139_MOESM1_ESM.pdf/9629462)

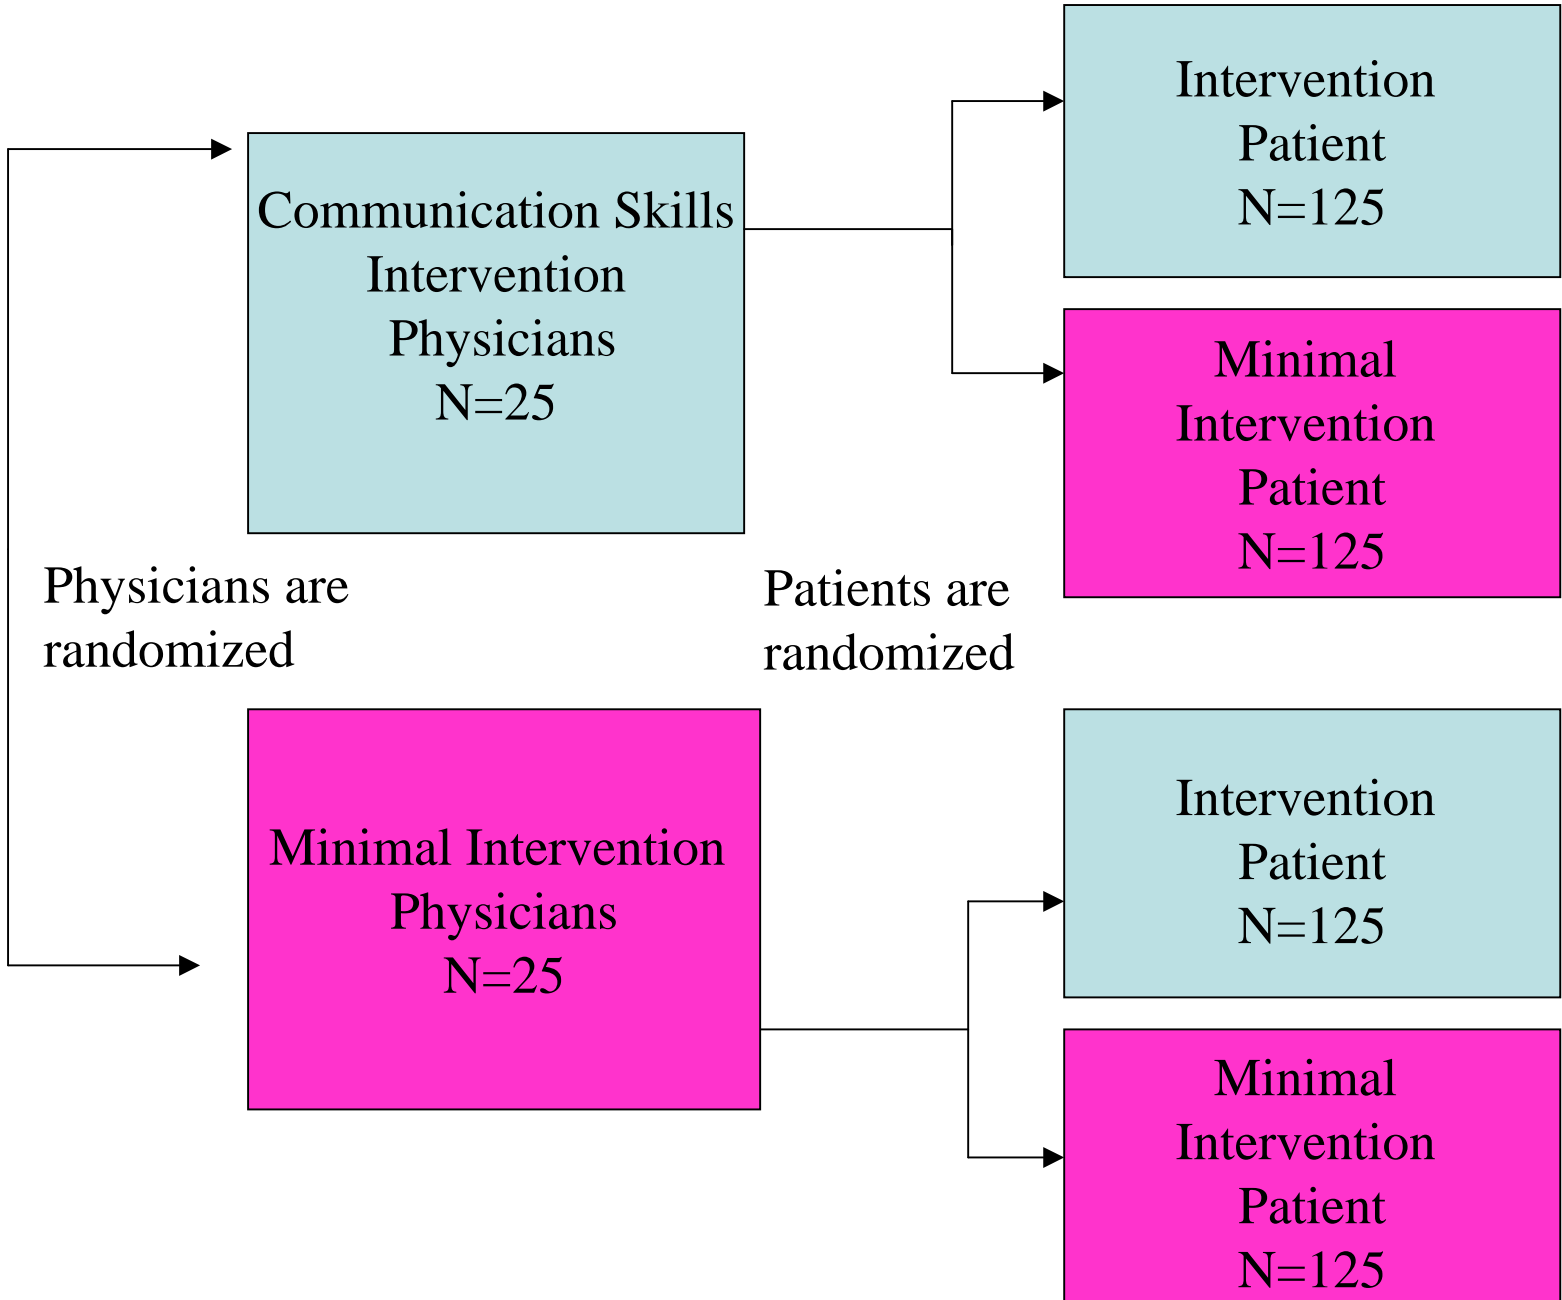

Supplement: MOESM1 [file 9629462]
